# Supplementary material
Source: Elsevier journal article supplement (https://www.sciencedirect.com/science/article/pii/S0213911116300590)
Supplement: mmc2 [file S0213911116300590:mmc2.docx]

**Table II**

Illustrative statements of intrinsic motivation. Spanish original quotes.

| Codes | Subcodes | Quote | |
| --- | --- | --- | --- |
| Like/enjoy | Science, humanity | …el ejercicio de la medicina… es un ejercicio en que la rentabilidad intelectual, la rentabilidad afectiva la obtienes de forma rápida. | |
| Like/enjoy | Professional development | en nuestra profesión hay una serie de fases ¿no? entonces, bueno pues cuando estás empezando pues es bonito ¿no? la… la primera parte, cuando tú te estás formando, estás… aprendiendo ¿no? pero luego ya claro, luego ya vas… tú vas… tomando responsabilidades, entonces bueno yo… la verdad es que ahora me lo paso muy bien | |
| Vocation |  | Cuando, yo entré, me sentí… ‘estoy en casa’, esto es lo que yo quiero. O sea yo tuve la sensación de que acerté desde el primer momento. Por una inclinación natural eh. | |
|  |  |  | |
| Like/enjoy |  | Me parece muy divertido, aprender de medicina y ejercer medicina, luego cuando he estado ejerciendo. Las cosas que te atraen pues la haces, y si a ti te gusta hacer windsurf, pues no,… pasas frio pero no te enteras porque estás haciendo windsurf. | |
| Like/enjoy | Science, research, service, teaching | | *(la medicina)*...es un sistema global eh, o sea vamos en concreto la asistencia... yo la entiendo inseparable de la docencia y la investigación, clínica... donde los problemas que tu lees, que tú ves, los planteas y los investigas... muy atractivo | |
| Vocation |  | …yo recuerdo entrar a un hospital y era como un sentir… ¿no? Que sientes que ese es tu sitio. | |
| Vocation | Service | …hay una vocación, que tenemos los que hemos hecho medicina, o los que se han dedicado a la enseñanza incluso, que, es de servicio… hay una vocación muy intrínseca de servicio. | |

**Table III**

Illustrative statements of crowding out. Spanish original quotes

| Codes | Subcodes | Subsubcodes | Quotea,b | |
| --- | --- | --- | --- | --- |
| Financial incentives | Peonada-FFS | Opportunistic behaviour | La ‘peonada’, como incentivo, pues bueno el problema, más que incentivo yo creo que puede ser una perversión... del tema. | |
| Financial incentives | Professional career-1 | Opportunistic behavior | tengo que pasar de nivel y entonces me apunto en un curso. A ver ¿qué curso? ¿Cuál es el que más puntos da? Pues uno que habla de otorrino… pero ‘si tú eres cirujano ¿no?’ y eso se está haciendo | |
| Control | Lack of autonomy |  | De dentro de la consulta si, pero para hacer cosas de esas ¿autonomía? Nada, nada, nada de nada. Estamos en un sistema supercentralizado. O sea que quieren tenerlo todo… no se fían | |
| Financial incentives | Peonada-FFS | Task meaning change | no hago peonadas porque no creo… no me veo en… eso del dinero. hay gente, médicos, y no médicos, enfermeras, auxiliares y todo el mundo, que como se pagan muy bien llega un momento en el que te compensa hacer un día o dos días a la semana porque te lo pagan muy bien, y eso te sirve para tus gastos, para tu hijo en la universidad, para lo que sea. Y eso pervert… pervierte el sistema. Pervierte el sistema. | |
| Financial incentives | Profesional career-1 | Lack of recognition | | … va a cobrar lo mismo el que he llamado piedra que el que… Hacen las mismas horas, las mismas guardias, las mismas no sé que… se van a llevar a casa lo mismo. Se van a llevar a casa el mismo… es decir, de alguna manera se está primando al que… al que hace poco, ¿eh? | |

**Table IV**

Illustrative statements of crowding-in. Spanish original quotes.

| Code | Subcode | Subsbcode | Quote |
| --- | --- | --- | --- |
| Non-financial incentives | Professional career-2 | Further education | Hay que meter otros objetivos y otras cosas que no sean solamente el económico eh. A mí me parece que el reconocimiento profesional, la labor bien hecha, los incentivos de dirección, de gestión eh… todas esas cosas hay que meterlas en la carrera profesional, no solamente es pasar de un nivel para que me paguen cien euros más. |
|  |  |  |  |
| Non-financial incentives | Research |  | Si tú tienes una motivación… vas a publicar… estás si tú tienes una motivación, porque tienes una proyección, vas a publicar dos trabajos en Lancet, uno no sé donde, estás en una línea de trabajo de algo apasionante, una tesis doctoral, ahora un chaval que te, un grupo que sabe… ¡coño! Esto… esto… esto… es… mucha entrada de dólares, dólares mentales para dar energía a… en una línea de trabajo apasionante , tesis doctoral… eso son muchos dolares mentales. |
|  |  |  |  |
| Non-financial incentives | Recognition |  | Deberíamos ser reconocidos pero… el reconocimiento tendría que estar graduado de alguna manera y medido antes, por el esfuerzo… a todos nos parece que somos los mejores, los que más trabajamos, que nos tienen que estar haciendo reverencias continuamente, pero eso hay que, o sea eso habría que… tendría que estar medido…. |
|  |  |  |  |
| Non-financial incentives | Research |  | No tendría por qué ser monetarios… en vez de decir eso me dicen, vamos a desaparecer la lista de espera y vas a ver todos los pacientes al día siguiente, ¿no? si eso se cumple, eh montamos una unidad de ensayos clínicos, con tres enfermeras, dos data managers, y además liberamos el cincuenta por ciento de dos de tus adjuntos… veo una zanahoria tan grande,… |
