# Supplementary material
Source: Elsevier journal article supplement (https://www.sciencedirect.com/science/article/pii/S0213911116300590)
Supplement: mmc3 [file S0213911116300590:mmc3.docx]

**Annex**

**Interview protocol**

This annex shows the protocol of questions we used to conduct the interviews. Questions in the protocol served us as a guide to go through rather than a fixed questionnaire. As the interviews were semi structured and open answers were allowed, sometimes further of the list questions were answered earlier.

This annex contains two protocols of questions. The first protocol shows the original questions in Spanish language and the second shows the translation of the first one to the English. Both are shown in different subsections after page breaks to help the reader to find and follow the questions.

1. **Incentivos y motivación intrínseca en sanidad: protocolo para entrevista**

**Parte 1 – Motivos, razones y motivación intrínseca**

1. **Motivación intrínseca teórica: ideal, a priori**
   1. Háblenos de los motivos que le llevaron a ser médico:

- Circunstancias: familia, entorno, contexto histórico,…
- Motivos personales: altruismo, prestigio, reconocimiento, vocación por ayudar…

- 1. **Motivación intrínseca aplicada: en la práctica, a posteriori**

1. ¿Vive su profesión con pasión? ¿Le satisface lo que hace? ¿Disfruta de ella como en las primeras etapas?
2. ¿Qué aspectos de su trabajo le resultan más interesantes o atractivos? ¿Por qué?
   1. **Valores del médico: preferencias sociales**
   2. Describa al profesional médico ideal y sus características.
   3. Actualmente, los profesionales del sector, ¿están lejos o cerca de este ideal?
   4. **Motivación intrínseca, definición**
3. ¿Qué objetivos persigue un médico como profesional?
4. ¿Cuáles son sus recompensas?

**Parte 2 – *Crowding out/in***

- 1. ***Crowding out/in:* premios y castigos**
     1. ¿Qué opina de los incentivos económicos como incentivo a la labor de los médicos? (Mencionar también supervisión y control)
- ¿Motivan?
- ¿Mejoran resultados del sector?
- ¿Se usan para mejorar el funcionamiento del sistema y la motivación de los médicos?
- Si no es así, ¿podrían ser utilizados de ese modo? ¿Cómo?
  - 1. Por favor comente sus experiencias con este tipo de incentivos (negativas y/o positivas)
    2. Opine sobre los sistemas de incentivos aplicados y sus efectos.
- Autoconcertación: pago por acto fuera de horas/peonadas.
- Carrera profesional.
- Otros que conozca/experimentado.
  1. ***Crowding out/in:* competencia, reconocimiento y prestigio**
     1. ¿Se siente competente desde su puesto de trabajo en la consecución de los objetivos que se propone?

- ¿Observa que su trabajo produce efecto en la población objetivo (pacientes y/o sociedad)?
- ¿Se ve impedido o favorecido para ello por la actual gestión del sistema?
  - 1. ¿La labor médica está debidamente valorada?
    2. ¿Siente reconocimiento hacia su labor y la labor médica en general?
- Pacientes.
- Gestores.
- Entorno social.
- Opinión pública.
  1. ***Crowding out/in:* autonomía**
     1. ¿Siente usted libertad (autonomía) para ejercer su profesión?
- El grado de autonomía percibido en el desempeño de su trabajo, ¿afecta positivamente o negativamente a su motivación por ejercer la medicina?
- ¿Podría mejorarse o es más que suficiente?
  - 1. ¿Se siente dirigido o apoyado?
    2. ¿La opinión de los médicos está presente en las decisiones de organización y dirección de la sanidad?
- Para su motivación para ejercer, ¿cómo de importante es que se considere a los médicos en la toma de decisiones y en la planificación estratégica del sector/organizacion? ¿Se puede considerar un incentivo?
  1. ***Crowding out/in:* gestión, administración**
     1. ¿Qué opina de la administración, gestión, gestores…? Su influencia sobre:
- Motivación.
- Desempeño.
- Comportamiento del *staff*.
  1. ***Crowding out/in:* valor profesión y profesional**
     1. ¿Qué siente usted después de un día/semana/mes de trabajo? ¿Qué valor le aporta su trabajo/profesión a usted? ¿Y a su entorno?
- ¿Satisfacción?
- ¿Impotencia?
- ¿Ambas? ¿Causas de cada una?

**Parte 3 – Capital motivacional: *crowding in* y políticas bien diseñadas**

- - 1. ¿Cómo incentivaría y motivaría usted a los médicos que trabajan en la sanidad pública? Mencionar determinantes clave.
    2. Háblenos de la organización y planificación del sector sanitario: ¿cómo lo rediseñaría para mejorarlo? ¿Alguna propuesta?
- Ideas/propuestas y su impacto en profesionales.
  - 1. ¿Deberían los médicos ser más partícipes en las decisiones de dirección, organización y planificación? ¿Por qué?
    2. ¿Existe o conoce alguna experiencia de incentivos y motivación a los médicos que haya tenido éxito y qué usted pondría en práctica? Poner ejemplos.

1. **Incentives and intrinsic motivation in health care: protocol for interviews**

**Part 1 – Motives, reasons and intrinsic motivation**

1. **Theoretical intrinsic motivation (SDT definitions)**
   1. Please talk about the motives that lead you to be a physician:

- Circumstances: family, environment, historic context…
- Personal motives: altruism, prestige, recognition, vocation for help…

- 1. **Applied intrinsic motivation (experienced in the field)**

1. ¿Do you live your profession with passion? ¿Do you get satisfaction from working as doctor? ¿Do you enjoy your profession as you did in early stages?
2. ¿Which aspects of your work do you find the most interesting ones? ¿Why?
   1. **Physician’s values: social preferences**
   2. Please, describe the ideal health professional (physician).
   3. Are the doctors currently working in the health care close or far from this “ideal doctor”?
   4. **Intrinsic motivation: definition**
3. Which goals pursue a doctor as a professional?
4. Which ones are their rewards?

**Part 2 – Crowding out/in**

- 1. **Crowding out/in: “carrots and sticks”**
     1. What is your opinion about the financial rewards to incentivize doctors’ performance? (mention monitoring and control as well)
- ¿Are they motivating?
- ¿Are they good to improve health sector outcomes?
- ¿Are they used to improve the system performance and physicians’ motivation?
- If not, could they be used in that way? How?
  - 1. Please comment on your experiences with this kind of incentives (negative and/or positive).
    2. Please give your opinion about the implemented incentive schemes and their effects.
- The out of hours FFS scheme (“peonadas”).
- Professional career.
- Any other you know/have experienced.
  1. **Crowding out/in: competence, recognition and prestige**
     1. Do you feel competence in achieving your goals at your workplace?

- Do you observe your work having the aimed impact in the objective population (patients and/or whole society)?
- In doing your work, do you feel yourself constrained or supported by current management system?
  - 1. Is the medical labour appropriately judged/assessed?
    2. Do you feel recognition towards your labour and towards the medical labour in general?
- Patients.
- Management.
- Socially.
- Public opinion.
  1. **Crowding out/in: autonomy**
     1. Do you feel freedom (autonomy) in doing your work?
- The degree of autonomy you perceive in doing your work, affects positively or negatively to your work motivation?
- Could that degree be improved or it is fairly enough?
  - 1. Do you feel driven or supported?
    2. Is the doctors’ opinion present in the decision making process of your organisation and the health care management?
- According to your motivation for work as physician, how important is for doctors to be considered in the decision making process and health care/organisation strategic planning? Could that be considered an incentive?
  1. **Crowding out/in: management**
     1. What is your opinion about management and managers? How do you think they may affect to:
- Motivation.
- Performance.
- Staff behaviour.
  1. **Crowding out/in: profession and professional’s value**
     1. What do you feel after one day/week/month of work? What is the value added by your work/profession to you and to the environment?
- Satisfaction?
- Impotence?
- Both? Reasons for each?

**Part 3 – Motivational capital: crowding in well-designed policies**

- - 1. How would you incentivise and motivate physicians working at health care? Mention key determinants.
    2. Please talk about the organisation and the health care sector planning: how do you redesign in order to improve it?
- Ideas/proposals and the impact on professionals you will expect from them
  - 1. Should the physicians be allowed to be more participative in the managerial decision making? Why?
    2. Do you know any experience of incentives and doctors’ motivation which have been successful and that you would put in practice if allowed? Examples?
